# Supplementary material
Source: MDPI journal article supplement (https://www.mdpi.com/2227-9040/12/4/59)
Supplement: s1 [file s1]

Supplementary Materials

# Aptasensors for the Detection of Environmental Contaminants of High Concern in Water Bodies: A Systematic Review

Eduardo Canek Reynoso <sup>1</sup>, Patrick Severin Sfragano <sup>2</sup>, Mario González-Perea <sup>3</sup>, Ilaria Palchetti <sup>2</sup> and Eduardo Torres <sup>4,\*</sup>

<sup>1</sup> Centro de Investigación en Salud Poblacional, Instituto Nacional de Salud Pública, Cuernavaca, Morelos 62100, México

<sup>2</sup> Department of Chemistry “Ugo Schiff”, University of Florence, 50019 Sesto Fiorentino, Italy

<sup>3</sup> Facultad de Ciencias Químicas, Benemérita Universidad Autónoma de Puebla, Puebla 72570, México

<sup>4</sup> Centro de Química, Instituto de Ciencias, Benemérita Universidad Autónoma de Puebla, Puebla 72570, México

\* Correspondence: eduardo.torres@correo.buap.mx

**Table S1.** Studies included through systematic review.

| Title                                                                                                                                                                   | Year | Analyte    | Analyte classification   | Transducer           | LOD       | Sensitivity | Water sample type | Test on real samples | Selectivity/specificity                | Reproducibility/repeatability (%RSD) | Stability                             | Reusability | Reference |
|-------------------------------------------------------------------------------------------------------------------------------------------------------------------------|------|------------|--------------------------|----------------------|-----------|-------------|-------------------|----------------------|----------------------------------------|--------------------------------------|---------------------------------------|-------------|-----------|
| Fabrication of a Novel Photoelectrochemical Aptasensor Using Gold Nanoparticle-Sensitized TiO <sub>2</sub> Film for Quantitative Determination of Diazinon in Solutions | 2023 | Diazinon   | Pesticides               | Opto-electrochemical | 12.7 ng/L | High        | River water       | Spiked               | Individual                             | 3.1                                  | 6% reduction after 2 weeks of storage | NR          | [1]       |
| A novel label-free dual-mode aptasensor based on the mutual regulation of silver nanoclusters and                                                                       | 2023 | Ampicillin | Pharmaceutical compounds | Optic                | 0.74 µg/L | Medium      | Lake water        | Spiked               | Individual interferers with the target | 3.8                                  | NR                                    | NR          | [2]       |

|                                                                                                                                                               |      |              |                   |                 |            |        |                              |        |                                        |      |                                                        |    |     |
|---------------------------------------------------------------------------------------------------------------------------------------------------------------|------|--------------|-------------------|-----------------|------------|--------|------------------------------|--------|----------------------------------------|------|--------------------------------------------------------|----|-----|
| MoSe <sub>2</sub> nanosheets for reliable detection of ampicillin                                                                                             |      |              |                   |                 |            |        |                              |        |                                        |      |                                                        |    |     |
| Fluorescent nanostructured carbon dot-aptasensor for chlorpyrifos detection: Elucidating the interaction mechanism for an environmentally hazardous pollutant | 2023 | Chlorpyrifos | Pesticides        | Optic           | 10 ng/L    | High   | River water                  | Spiked | Individual interferers with the target | 4.2  | 24% reduction after 8 days of storage                  | NR | [3] |
| Molecular simulation-guided aptasensor design of robust and sensitive lateral flow strip for cadmium ion detection                                            | 2023 | Cadmium      | Toxic heavy metal | Optic           | 3.37 mg/L  | Medium | River water                  | Spiked | Individual                             | 1.2  | Stability in real samples within 20 min                | NR | [4] |
| Development of an ultrasensitive rGO/AuNPs/ssDNA-based electrochemical aptasensor for detection of Pb <sup>2+</sup>                                           | 2023 | Lead         | Toxic heavy metal | Electrochemical | 0.315 mg/L | Medium | Ponds, lake, and river water | Spiked | Individual and mixed with interferers  | NR   | NR                                                     | NR | [5] |
| Field-deployable aptasensor with automated analysis of stain patterns for the detection of chlorpyrifos in water                                              | 2023 | Chlorpyrifos | Pesticides        | Optic           | 70 mg/L    | Medium | River water                  | Spiked | Individual interferers with the target | < 15 | Influence of temperature, pH and relative humidity was | NR | [6] |

|                                                                                                                                                            |      |             |                   |                      |            |           |                   |        |            |      |                                                                                   |    |      |
|------------------------------------------------------------------------------------------------------------------------------------------------------------|------|-------------|-------------------|----------------------|------------|-----------|-------------------|--------|------------|------|-----------------------------------------------------------------------------------|----|------|
|                                                                                                                                                            |      |             |                   |                      |            |           |                   |        |            |      | investi-<br>gated.                                                                |    |      |
| Construction of a novel fluorescent DNA aptasensor for the fast-response and sensitive detection of copper ions in industrial sewage                       | 2023 | Copper      | Toxic heavy metal | Optic                | 19.06 mg/L | Medium    | Industrial sewage |        | Individual | 2.6  | Incubation for 10 days under the same conditions                                  | NR | [7]  |
| Exploration of the Interaction of Cadmium and Aptamer by Molecular Simulation and Development of Sensitive Capillary Zone Electrophoresis-Based Aptasensor | 2023 | Cadmium     | Toxic heavy metal | Optic                | 0.562 mg/L | Medium    | River water       | Spiked | Individual | NR   | NR                                                                                | NR | [8]  |
| A photoelectrochemical aptasensor based on CoN/g-C <sub>3</sub> N <sub>4</sub> donor-acceptor configuration for sensitive detection of atrazine            | 2023 | Atrazine    | Pesticides        | Opto-electrochemical | 7.11 ag/L  | Ultrahigh | River water       | Spiked | Individual | 3.27 | Response remained stable after 23 cycles for 930 s under light off-on irradiation | NR | [9]  |
| Construction of electrochemiluminescence aptasensor for acetamiprid                                                                                        | 2023 | Acetamiprid | Pesticides        | Opto-electrochemical | 0.557 ng/L | High      | Pond water        | Spiked | Individual | 2.5  | Reported like                                                                     | NR | [10] |

|                                                                                                                                                                                           |      |                     |                        |                 |               |           |                                 |                             |                                                  |     |                                      |                                       |      |
|-------------------------------------------------------------------------------------------------------------------------------------------------------------------------------------------|------|---------------------|------------------------|-----------------|---------------|-----------|---------------------------------|-----------------------------|--------------------------------------------------|-----|--------------------------------------|---------------------------------------|------|
| detection using flower-<br>liked SnO <sub>2</sub> nanocrystals<br>encapsulated Ag <sub>3</sub> PO <sub>4</sub> com-<br>posite as luminophore                                              |      |                     |                        |                 |               |           |                                 |                             |                                                  |     | reprodu-<br>cibility                 |                                       |      |
| A convenient paper-based<br>fluorescent aptasensor for<br>high-throughput detection<br>of Pb <sup>2+</sup> in multiple real<br>samples (water-soil-food)                                  | 2023 | Lead                | Toxic heavy me-<br>tal | Optic           | 0.123<br>mg/L | Medium    | Lake<br>water                   | Spiked                      | Individual<br>and mixed<br>with inter-<br>ferers | 5.5 | Stored<br>for 40<br>days at<br>4 °C  | NR                                    | [11] |
| An interference-free SERS-<br>based aptasensor for<br>chlorpyrifos detection                                                                                                              | 2023 | Chlorpyri-<br>fos   | Pesticides             | Optic           | 66<br>ng/L    | High      | River<br>water                  | Spiked                      | Individual                                       | 5   | Tested<br>for 110<br>days            | NR                                    | [12] |
| Laser induced graphene<br>electrochemical aptasen-<br>sor based on tetrahedral<br>DNA for ultrasensitive on-<br>site detection of microcys-<br>tin-LR                                     | 2023 | Mycrocys-<br>tin-LR | Mycotoxin              | Electrochemical | 2.99<br>ng/L  | High      | Pond<br>and ri-<br>ver<br>water | Assay in<br>real<br>samples | Individual<br>and mixed<br>with inter-<br>ferers | 2   | Storage<br>of 7 days<br>at 4 °C      | NR                                    | [13] |
| Internal reference self-<br>powered aptasensor for<br>on-site detection of MC-<br>RR used sunlight as light<br>source and CoMoS <sub>4</sub> hol-<br>low nanospheres as pho-<br>tocathode | 2023 | Microcys-<br>tin-RR | Mycotoxin              | Electrochemical | 0.33<br>pg/L  | Ultrahigh | Lake<br>water                   | Spiked                      | Individual                                       | 2.6 | Saved at<br>4 °C for<br>two<br>weeks | NR                                    | [14] |
| Self-assembled electroac-<br>tive MOF–magnetic dis-<br>persible aptasensor                                                                                                                | 2023 | Mycrocys-<br>tin-LR | Mycotoxin              | Electrochemical | 40<br>ng/L    | High      | Eu-<br>trophic                  | Assay in<br>real<br>samples | Individual                                       | NR  | 9.1% sig-<br>nal re-<br>duction      | Reusability<br>after appro-<br>priate | [15] |

|                                                                                                                                                     |      |             |                          |                      |            |        |             |                       |                                       |           |                                                                  |                                                                                               |      |
|-----------------------------------------------------------------------------------------------------------------------------------------------------|------|-------------|--------------------------|----------------------|------------|--------|-------------|-----------------------|---------------------------------------|-----------|------------------------------------------------------------------|-----------------------------------------------------------------------------------------------|------|
| enables ultrasensitive microcystin-LR detection in eutrophic water                                                                                  |      |             |                          |                      |            |        | lake water  |                       |                                       |           | after 4 weeks at +4 °C                                           | temperature treatments                                                                        |      |
| Development of Fe-N-C single-atom nanozymes assisted aptasensor for the detection of acetamiprid in water samples                                   | 2023 | Acetamiprid | Pesticides               | Optic                | 3.76 mg/L  | Medium | River water | Spiked                | Individual and mixed with interferers | 4.46      | NR                                                               | NR                                                                                            | [16] |
| A Novel Fluorescent Aptasensor for Arsenic(III) Detection Based on a Triple-Helix Molecular Switch                                                  | 2023 | Arsenic     | Toxic heavy metal        | Optic                | 5.24 mg/L  | Medium | River water | Spiked                | Individual                            | 8         | NR                                                               | NR                                                                                            | [17] |
| Self-powered photoelectrochemical aptasensor based on hollow tubular g-C <sub>3</sub> N <sub>4</sub> /Bi/BiVO <sub>4</sub> for tobramycin detection | 2023 | Tobramycin  | Pharmaceutical compounds | Opto-electrochemical | 4.27 ng/L  | High   | River water | Spiked                | Individual                            | 4.8       | Recording under 10 “on-off” irradiation cycles                   | NR                                                                                            | [18] |
| A highly sensitive and selective photoelectrochemical aptasensor for atrazine based on Au NPs/3DOM TiO <sub>2</sub> photonic crystal electrode      | 2023 | Atrazine    | Pesticides               | Opto-electrochemical | 0.167 ng/L | High   | River water | Assay in real samples | Individual and mixed with interferers | 1.34-7.75 | Stable photocurrent after 2000s under visible light illumination | Surface recovery by chemical treatment without destroying the aptamer (85% response recovery) | [19] |

|                                                                                                                                                                                                                      |      |               |                          |                      |            |           |             |        |                                       |                                            |                                       |    |      |
|----------------------------------------------------------------------------------------------------------------------------------------------------------------------------------------------------------------------|------|---------------|--------------------------|----------------------|------------|-----------|-------------|--------|---------------------------------------|--------------------------------------------|---------------------------------------|----|------|
| In situ synthesis of label-free electrochemical aptasensor-based sandwich-like AuNPs/PPy/Ti <sub>3</sub> C <sub>2</sub> Tx for ultrasensitive detection of lead ions as hazardous pollutants in environmental fluids | 2023 | Lead          | Toxic heavy metal        | Electrochemical      | 2.07 pg/L  | Ultrahigh | River water | Spiked | Individual and mixed with interferers | 4.89                                       | 7.48% reduction after a week at +4 °C | NR | [20] |
| Label-free electrochemical aptasensor based on gold nanoparticles/titanium carbide MXene for lead detection with its reduction peak as index signal                                                                  | 2023 | Lead          | Toxic heavy metal        | Electrochemical      | 62.16 mg/L | Medium    | River water | Spiked | Individual                            | Repeatability: 1.86; reproducibility: 6.25 | 5.03% reduction after a week at +4 °C | NR | [21] |
| A novel electrochemical aptasensor based on eco-friendly synthesized titanium dioxide nanosheets and polyethyleneimine grafted reduced graphene oxide for ultrasensitive and selective detection of ciprofloxacin    | 2023 | Ciprofloxacin | Pharmaceutical compounds | Electrochemical      | 0.232 mg/L | Medium    | Lake water  | Spiked | Individual                            | 1.2                                        | 96.6% after 10 days storage           | NR | [22] |
| On-off-on' electrochemiluminescent aptasensor for Hg <sup>2+</sup> based on dual signal amplification enabled by a self-enhanced                                                                                     | 2022 | Mercury       | Toxic heavy metal        | Opto-electrochemical | 0.601 pg/L | Ultrahigh | River water | Spiked | Individual and mixed with interferers | 1.1                                        | Tested after 15 days                  | NR | [23] |

|                                                                                                                                                                             |      |                       |                          |                      |            |           |             |        |                                       |      |                                                                      |                                                                                      |      |
|-----------------------------------------------------------------------------------------------------------------------------------------------------------------------------|------|-----------------------|--------------------------|----------------------|------------|-----------|-------------|--------|---------------------------------------|------|----------------------------------------------------------------------|--------------------------------------------------------------------------------------|------|
| luminophore and resonance energy transfer                                                                                                                                   |      |                       |                          |                      |            |           |             |        |                                       |      |                                                                      |                                                                                      |      |
| Design of 2D/2D CoAl LDH/g-C <sub>3</sub> N <sub>4</sub> heterojunction-driven signal amplification: Fabrication and assay for photoelectrochemical aptasensor of ofloxacin | 2022 | Oflaxacine            | Pharmaceutical compounds | Opto-electrochemical | 3.01 fg/L  | Ultrahigh | River water | Spiked | Individual                            | 1.7  | 20 s intervals for continuous 12 cycles                              | NR                                                                                   | [24] |
| In situ fabrication of urchin-like Cu@carbon nanoneedles based aptasensor for ultrasensitive recognition of trace mercury ion                                               | 2022 | Mercury               | Toxic heavy metal        | Electrochemical      | 0.742 pg/L | Ultrahigh | Lake water  | Spiked | Individual and mixed with interferers | 2.3  | Tested after 30 days                                                 | The reusability was measured through 30 times of hybridization-regeneration reaction | [25] |
| Direct Z-scheme In <sub>2</sub> S <sub>3</sub> /Bi <sub>2</sub> S <sub>3</sub> heterojunction-based photoelectrochemical aptasensor for detecting oxytetracycline in water  | 2022 | Oxytetracycline       | Pharmaceutical compounds | Opto-electrochemical | 3.22 ng/L  | High      | River water | Spiked | Individual                            | 0.97 | Excellent irradiation stability after 20 continuous radiation cycles | NR                                                                                   | [26] |
| A fluorescence aptasensor based on carbon quantum dots and magnetic Fe <sub>3</sub> O <sub>4</sub>                                                                          | 2022 | 17 $\beta$ -estradiol | Pharmaceutical compounds | Optic                | 0.948 ng/L | High      | Lake water  | Spiked | Individual                            | 4    | NR                                                                   | NR                                                                                   | [27] |

|                                                                                                                                                                                |      |                 |                          |                      |            |           |             |        |                      |     |                             |    |      |
|--------------------------------------------------------------------------------------------------------------------------------------------------------------------------------|------|-----------------|--------------------------|----------------------|------------|-----------|-------------|--------|----------------------|-----|-----------------------------|----|------|
| nanoparticles for highly sensitive detection of 17 beta-estradiol                                                                                                              |      |                 |                          |                      |            |           |             |        |                      |     |                             |    |      |
| A gold nanoparticle-based visual aptasensor for rapid detection of acetamiprid residues in agricultural products using a smartphone                                            | 2022 | Acetamiprid     | Pesticides               | Optic                | 0.848 mg/L | Low       | River water | Spiked | Individual           | 1.7 | NR                          | NR | [28] |
| Colorimetric aptasensor for sensitive detection of quinclorac based on exonuclease III-assisted cyclic release of phosphorodiamidate morpholino oligomer mimic enzyme strategy | 2022 | Quinclorac      | Pesticides               | Optic                | 7.019 mg/L | Medium    | River water | Spiked | Individual           | 4   | NR                          | NR | [29] |
| An enhanced photoelectrochemical ofloxacin aptasensor using NiFe layered double hydroxide/graphitic carbon nitride heterojunction                                              | 2021 | Oflaxacine      | Pharmaceutical compounds | Opto-electrochemical | 12.64 pg/L | Ultrahigh | River water | Spiked | Individual           | 4.6 | 12 on-off cycles            | NR | [30] |
| A highly selective photoelectrochemical chloramphenicol aptasensor based on AgBr/BiOBr heterojunction                                                                          | 2021 | Chloramphenicol | Pharmaceutical compounds | Opto-electrochemical | 0.110 mg/L | Medium    | River water | Spiked | Individual and Mixed | 4.2 | 7 cycles on/off; repeatable | NR | [31] |



|                                                                                                                                               |      |                                        |                      |                      |            |        |                                                       |        |            |      |                                                                                     |                                                                |      |
|-----------------------------------------------------------------------------------------------------------------------------------------------|------|----------------------------------------|----------------------|----------------------|------------|--------|-------------------------------------------------------|--------|------------|------|-------------------------------------------------------------------------------------|----------------------------------------------------------------|------|
| A highly sensitive and group-targeting aptasensor for total phthalate determination in the environment                                        | 2021 | Phthalate                              | Industrial chemicals | Optic                | 0.591 ng/L | High   | River water                                           | Spiked | Individual | 21.3 | NR                                                                                  | NR                                                             | [32] |
| Reusable, facile, and rapid aptasensor capable of online determination of trace mercury                                                       | 2021 | Mercury                                | Toxic heavy metal    | Optic                | 0.401 mg/L | Medium | Waste-water                                           | Spiked | Individual | 3    | NR                                                                                  | 110 times of consecutive detection, Tested 31 times in real ww | [33] |
| A highly sensitive photoelectrochemical aptasensor based on BiVO <sub>4</sub> nanoparticles-TiO <sub>2</sub> nanotubes for detection of PCB72 | 2021 | 2,3',5,5'-Tetrachlorobiphenyl (PCB 72) | Industrial chemicals | Opto-electrochemical | 0.231 ng/L | High   | Lake water                                            | Spiked | Individual | 5.5  | Two week of storage                                                                 | NR                                                             | [34] |
| Highly sensitive photoelectrochemical aptasensor based on MoS <sub>2</sub> quantum dots/TiO <sub>2</sub> nanotubes for detection of atrazine  | 2021 | Atrazine                               | Pesticides           | Opto-electrochemical | 0.216 ng/L | High   | Agricultural waste water, sewage water and lake water | Spiked | Individual | 5.6  | The long-term storage investigated (don't say how many days or minutes was storage) | NR                                                             | [35] |

|                                                                                                                                                                    |      |            |                          |                      |           |           |                             |                       |                                        |     |                      |    |      |
|--------------------------------------------------------------------------------------------------------------------------------------------------------------------|------|------------|--------------------------|----------------------|-----------|-----------|-----------------------------|-----------------------|----------------------------------------|-----|----------------------|----|------|
| An Electrochemical Aptasensor for Pb <sup>2+</sup> Detection Based on Metal-Organic-Framework-Derived Hybrid Carbon                                                | 2021 | Lead       | Toxic heavy metal        | Electrochemical      | 95.9 ng/L | High      | River water                 | Spiked                | Individual                             | 4   | NR                   | NR | [36] |
| MoS <sub>2</sub> /PPy Nanocomposite as a Transducer for Electrochemical Aptasensor of Ampicillin in River Water                                                    | 2021 | Ampicillin | Pharmaceutical compounds | Electrochemical      | 97.8 pg/L | Ultrahigh | River water                 | Spiked                | Individual                             | 2.2 | Two weeks of storage | NR | [37] |
| Sensitive and selective detection of Hg <sup>2+</sup> in tap and canal water via self-enhanced ECL aptasensor based on NH <sub>2</sub> -Ru@SiO <sub>2</sub> -NGQDs | 2021 | Mercury    | Toxic heavy metal        | Opto-electrochemical | 6.02 ng/L | High      | Canal water                 | Spiked                | Individual and mixed with interferers  | 1.1 | Tested during 7 days | NR | [38] |
| Development of a label-free electrochemical aptasensor based on diazonium electrodeposition: Application to cadmium detection in water                             | 2021 | Cadmium    | Toxic heavy metal        | Electrochemical      | 30.9 ng/L | High      | River water                 | Assay in real samples | Individual                             | 4.5 | NR                   | NR | [39] |
| Ultra-sensitive electrochemical aptasensor based on zeolitic imidazolate framework-8 derived Ag/Au core-shell nanoparticles for mercury detection in water samples | 2021 | Mercury    | Toxic heavy metal        | Electrochemical      | 3.6 fg/L  | Ultrahigh | Waste-water and River water | Spiked                | Individual interferers with the target | 3.9 | Evalated for 18 days | NR | [40] |

|                                                                                                                                           |      |                       |                          |                 |                  |           |                                                                            |                       |                                       |     |                |    |      |
|-------------------------------------------------------------------------------------------------------------------------------------------|------|-----------------------|--------------------------|-----------------|------------------|-----------|----------------------------------------------------------------------------|-----------------------|---------------------------------------|-----|----------------|----|------|
| Ultrasensitive detection of trace Hg <sup>2+</sup> by SERS aptasensor based on dual recycling amplification in water environment          | 2021 | Mercury               | Toxic heavy metal        | Optic           | 22 fg/L          | Ultrahigh | Lake water                                                                 | Spiked                | Individual                            | 3.2 | NR             | NR | [41] |
| Simultaneous Quantification of Ampicillin and Kanamycin in Water Samples Based on Lateral Flow Aptasensor Strip with an Internal Line     | 2021 | Ampicillin, Kanamycin | Pharmaceutical compounds | Optic           | 60 pg/L, 15 pg/L | Ultrahigh | Hospital waste water, Chicken farm waste water and Aquaculture waste water | Assay in real samples | Individual                            | 4.8 | NR             | NR | [42] |
| A Cationic Surfactant-Decorated Liquid Crystal-Based Aptasensor for Label-Free Detection of Malathion Pesticides in Environmental Samples | 2021 | Malathion             | Pesticides               | Optic           | 0.154 ng/L       | High      | River water                                                                | Spiked                | Individual and mixed with interferers | 4   | NR             | NR | [43] |
| A disposable aptasensor based on a gold-plated coplanar electrode array for                                                               | 2021 | Copper                | Toxic heavy metal        | Electrochemical | 0.189 pg/L       | Ultrahigh | Lake water                                                                 | Spiked                | Individual                            | 8   | 6 days storage | NR | [44] |

|                                                                                                                                                                                     |      |                    |                          |                      |            |           |                |        |                                       |     |                                   |    |      |
|-------------------------------------------------------------------------------------------------------------------------------------------------------------------------------------|------|--------------------|--------------------------|----------------------|------------|-----------|----------------|--------|---------------------------------------|-----|-----------------------------------|----|------|
| on-site and real-time de-termination of Cu <sup>2+</sup>                                                                                                                            |      |                    |                          |                      |            |           |                |        |                                       |     |                                   |    |      |
| A label-free enrofloxacin electrochemical aptasensor constructed by a semi-conducting CoNi-based metal-organic framework (MOF)                                                      | 2021 | Enrofloxacin       | Pharmaceutical compounds | Electrochemical      | 0.22 pg/L  | Ultrahigh | River water    | Spiked | Individual and mixed with interferers | 0.4 | Tested for 15 days                | NR | [45] |
| An electrochemiluminescence aptasensor for diethylstilbestrol assay based on resonance energy transfer between Ag <sub>3</sub> PO <sub>4</sub> -Cu-MOF(ii) and silver nanoparticles | 2021 | Diethylstilbestrol | Pharmaceutical compounds | Opto-electrochemical | 0.19 mg/L  | Medium    | Fishpond water | Spiked | Individual and mixed with interferers | 3.2 | Continuous scanning for 11 cycles | NR | [46] |
| An Ultrasensitive Label-Free Fluorescent Aptasensor Platform for Detection of Sulfamethazine                                                                                        | 2021 | Sulfamethazine     | Pharmaceutical compounds | Optic                | 0.821 mg/L | Medium    | Lake water     | Spiked | Individual                            | 4.4 | NR                                | NR | [47] |
| Graphene oxide-regulated low-background aptasensor for the turn on detection of tetracycline                                                                                        | 2021 | Tetracycline       | Pharmaceutical compounds | Optic                | 6.2 ng/L   | High      | Wastewater     | Spiked | Individual and mixed with interferers | 4.8 | NR                                | NR | [48] |
| B, N co-doped graphene synergistic catalyzed ZnO quantum dots with amplified cathodic electrochemiluminescence for                                                                  | 2021 | Microcystin-LR     | Mycotoxin                | Electrochemical      | 29.86 pg/L | Ultrahigh | Lake water     | Spiked | Individual                            | 4.7 | Stability for two weeks           | NR | [49] |

|                                                                                                                                                                           |      |                  |                          |                      |            |           |             |        |                                        |     |                    |    |      |
|---------------------------------------------------------------------------------------------------------------------------------------------------------------------------|------|------------------|--------------------------|----------------------|------------|-----------|-------------|--------|----------------------------------------|-----|--------------------|----|------|
| fabricating microcystin-LR aptasensor                                                                                                                                     |      |                  |                          |                      |            |           |             |        |                                        |     |                    |    |      |
| Catalysis-induced performance enhancement of an electrochemical microcystin-LR aptasensor based on cobalt-based oxide on a B, N co-doped graphene hydrogel                | 2021 | Microcystin-LR   | Mycotoxin                | electrochemical      | 29.86 pg/L | Ultrahigh | Lake water  | Spiked | Individual                             | 8.7 | T10 days stability | NR | [50] |
| Colorimetric aptasensor for sensitive detection of kanamycin based on target-triggered catalytic hairpin assembly amplification and DNA-gold nanoparticle probes          | 2021 | Kanamycin        | Pharmaceutical compounds | Optic                | 4.8 ng/L   | High      | River water | Spiked | Individual and mixed with interferers  | 3   | NR                 | NR | [51] |
| A dichromatic label-free aptasensor for sulfadimethoxine detection in fish and water based on AuNPs color and fluorescent dyeing of double-stranded DNA with SYBR Green I | 2020 | Sulfadimethoxine | Pharmaceutical compounds | Optic                | 3.4 mg/L   | Medium    | Pond water  | Spiked | Individual interferers with the target | 7   | NR                 | NR | [52] |
| Co <sub>3</sub> O <sub>4</sub> nanoparticles/graphitic carbon nitride heterojunction for                                                                                  | 2020 | Oxytetracycline  | Pharmaceutical compounds | Opto-electrochemical | 1.6 ng/L   | High      | River water | Spiked | Individual                             | 3.3 | 500 s light on-off | NR | [53] |

|                                                                                                                                                                                                                                                                                            |      |                                        |                          |                      |                        |           |                                      |                       |                                        |     |                                         |    |      |
|--------------------------------------------------------------------------------------------------------------------------------------------------------------------------------------------------------------------------------------------------------------------------------------------|------|----------------------------------------|--------------------------|----------------------|------------------------|-----------|--------------------------------------|-----------------------|----------------------------------------|-----|-----------------------------------------|----|------|
| photoelectrochemical aptasensor of oxytetracycline                                                                                                                                                                                                                                         |      |                                        |                          |                      |                        |           |                                      |                       |                                        |     |                                         |    |      |
| An ultrasensitive electrochemiluminescence aptasensor for the detection of diethylstilbestrol based on the enhancing mechanism of the metal-organic framework NH <sub>2</sub> -MIL-125(Ti) in a 3,4,9,10-perylene-tetracarboxylic acid/K <sub>2</sub> S <sub>2</sub> O <sub>8</sub> system | 2020 | Diethylstilbestrol                     | Pharmaceutical compounds | Opto-electrochemical | 75 fg/L                | Ultrahigh | Pond water, tap water and lake water | Spiked                | Individual and mixed with interferers  | 2   | 20 cycles of successive potential scans | NR | [54] |
| A low-cost paper-based aptasensor for simultaneous trace-level monitoring of mercury (II) and silver (I) ions                                                                                                                                                                              | 2020 | Mercury and Silver                     | Toxic heavy metal        | Optic                | 0.267 ng/L, 0.109 ng/L | High      | Lake water                           | Spiked                | Individual interferers with the target | 0.1 | NR                                      | NR | [55] |
| Ultrasensitive colorimetric aptasensor for Hg <sup>2+</sup> detection using Exo-III assisted target recycling amplification and unmodified AuNPs as indicators                                                                                                                             | 2020 | Mercury                                | Toxic heavy metal        | Optic                | 40 ng/L                | High      | Lake water                           | Assay in real samples | Individual and mixed with interferers  | 0.4 | NR                                      | NR | [56] |
| Electrochemical aptasensor for ultrasensitive detection of PCB77 using                                                                                                                                                                                                                     | 2020 | 3,3',4,4'-Tetrachlorobiphenyl (PCB 77) | Industrial chemicals     | Electrochemical      | 80 fg/L                | Ultrahigh | River water                          | Spiked                | Individual                             | 4.2 | Tested after 30 days                    | NR | [57] |

|                                                                                                                                                                       |      |             |                          |                 |            |           |             |                       |                                        |     |                         |                                                      |      |
|-----------------------------------------------------------------------------------------------------------------------------------------------------------------------|------|-------------|--------------------------|-----------------|------------|-----------|-------------|-----------------------|----------------------------------------|-----|-------------------------|------------------------------------------------------|------|
| thionine-functionalized MoS <sub>2</sub> -rGO nanohybrid                                                                                                              |      |             |                          |                 |            |           |             |                       |                                        |     |                         |                                                      |      |
| Ultrasensitive detection of amoxicillin by TiO <sub>2</sub> -g-C <sub>3</sub> N <sub>4</sub> @AuNPs impedimetric aptasensor: Fabrication, optimization, and mechanism | 2020 | Amoxicillin | Pharmaceutical compounds | Electrochemical | 73 ng/L    | High      | Waste-water | Assay in real samples | Individual interferers with the target | 2   | Tested for 20 days      | NR                                                   | [58] |
| Ultrasensitive detection of bisphenol A under diverse environments with an electrochemical aptasensor based on multicomponent AgMo heteronanostructure                | 2020 | Bisphenol A | Industrial chemicals     | Electrochemical | 0.199 pg/L | Ultrahigh | River water | Spiked                | Individual and mixed with interferers  | 4.4 | Tested for 15 days      | Regenerated and repeated by 7 cycles of regeneration | [59] |
| A photoelectrochemical aptasensor for the determination of bisphenol A based on the Cu (I) modified graphitic carbon nitride                                          | 2020 | Bisphenol A | Industrial chemicals     | Electrochemical | 15 pg/L    | Ultrahigh | Waste-water | Spiked                | Individual                             | 3.1 | Tested for 20 days      | NR                                                   | [60] |
| A Sensitive Impedimetric Aptasensor Based on Carbon Nanodots Modified Electrode for Detection of 17ss-Estradiol                                                       | 2020 | Estradiol   | Pharmaceutical compounds | Electrochemical | 0.136 ng/L | High      | River water | Spiked                | Individual and mixed with interferers  | 1.3 | Stability after 30 days | NR                                                   | [61] |

|                                                                                                                                                                 |      |                                        |                          |                      |            |           |                       |        |                                        |                                                 |                                                  |                                 |      |
|-----------------------------------------------------------------------------------------------------------------------------------------------------------------|------|----------------------------------------|--------------------------|----------------------|------------|-----------|-----------------------|--------|----------------------------------------|-------------------------------------------------|--------------------------------------------------|---------------------------------|------|
| A novel SWCNT-amplified signal-on electrochemical aptasensor for the determination of trace level of bisphenol A in human serum and lake water                  | 2020 | Bisphenol A                            | Industrial chemicals     | Electrochemical      | 18 ag/L    | Ultrahigh | Lake water            | Spiked | Individual interferers with the target | 2.1                                             | Tested during 17 days                            | Cannot be re-used for detection | [62] |
| Electrochemical surface plasmon resonance (EC-SPR) aptasensor for ampicillin detection                                                                          | 2019 | Ampicillin                             | Pharmaceutical compounds | Optic                | 0.35 mg/L  | Low       | River water           | Spiked | Individual interferers with the target | 4.5                                             | NR                                               | NR                              | [63] |
| Label-Free Fluorescence-Based Aptasensor for the Detection of Sulfadimethoxine in Water and Fish                                                                | 2019 | Sulfadimethoxine                       | Pharmaceutical compounds | Optic                | 1.5 mg/L   | Medium    | Lake water            | Spiked | Individual                             | 2.5-6.0 (water samples); 3.3-6.7 (fish samples) | NR                                               | NR                              | [64] |
| Label-free and highly selective electrochemical aptasensor for detection of PCBs based on nickel hexacyanoferrate nanoparticles/reduced graphene oxides hybrids | 2019 | 3,3',4,4'-Tetrachlorobiphenyl (PCB 77) | Industrial chemicals     | Electrochemical      | 0.22 ng/L  | High      | Lake water            | Spiked | Individual                             | 5                                               | Storage for two weeks                            | 5 lectures same assay           | [65] |
| Design of a simple and novel photoelectrochemical aptasensor for detection of 3,3',4,4'-tetrachlorobiphenyl                                                     | 2019 | 3,3',4,4'-Tetrachlorobiphenyl (PCB 77) | Industrial chemicals     | Opto-electrochemical | 99.86 pg/L | Ultrahigh | Domestic sewage water | Spiked | Individual                             | 6.1                                             | Tested 20 minutes and after two weeks of storage | NR                              | [66] |



|                                                                                                                                                |      |                                            |                          |                 |                                 |           |                                    |                       |            |     |                              |                                    |      |
|------------------------------------------------------------------------------------------------------------------------------------------------|------|--------------------------------------------|--------------------------|-----------------|---------------------------------|-----------|------------------------------------|-----------------------|------------|-----|------------------------------|------------------------------------|------|
| Novel nanoarchitecture of Co-MOF-on-TPN-COF hybrid: Ultralowly sensitive bioplatfrom of electrochemical aptasensor toward ampicillin           | 2019 | Ampicillin                                 | Pharmaceutical compounds | Electrochemical | 0.216 pg/L                      | Ultrahigh | River water                        | Spiked                | Individual | 3.3 | Tested for 15 days, 8 cycles | NR                                 | [67] |
| Multicolor Aptasensor Based on DNA-Induced Au-Ag Nanorods for Simultaneous and Visual Detection of Inorganic and Organic Mercury               | 2019 | Mercury<br>Methyl-mercury<br>Ethyl-mercury | Toxic heavy metal        | Optic           | 2 mg/L,<br>9.9 mg/L,<br>10 mg/L | Low       | Seawater                           | Spiked                | Individual | NR  | NR                           | NR                                 | [68] |
| Fluorometric aptasensor for cadmium(II) by using an aptamer-imprinted polymer as the recognition element                                       | 2019 | Cadmium                                    | Toxic heavy metal        | Optic           | 0.135 ng/L                      | High      | Irrigation water, industrial water | Assay in real samples | Individual | 9.9 | Tested 1 month of storage    | NR                                 | [69] |
| Fluorometric label-free aptasensor for detection of the pesticideacetamidiprid by using cationic carbon dots prepared with cetrimonium bromide | 2019 | Acetamidiprid                              | Pesticides               | Optic           | 66.8 ng/L                       | High      | Wastewater                         | Spiked                | Individual | 3.5 | NR                           | NR                                 | [70] |
| Reusable chemiluminescent fiber optic aptasensor for the determination                                                                         | 2019 | 17 $\beta$ -estradiol                      | Pharmaceutical compounds | Optic           | 49.02 ng/L                      | High      | Wastewater                         | Spiked                | Individual | 9.2 | NR                           | Could be reused at least 150 times | [71] |

|                                                                                                                                                                      |      |                 |                          |                 |           |           |             |        |                                       |   |                         |                            |      |
|----------------------------------------------------------------------------------------------------------------------------------------------------------------------|------|-----------------|--------------------------|-----------------|-----------|-----------|-------------|--------|---------------------------------------|---|-------------------------|----------------------------|------|
| of 17 beta-estradiol in water samples                                                                                                                                |      |                 |                          |                 |           |           |             |        |                                       |   |                         |                            |      |
| A SWCNT based aptasensor system for antibiotic oxytetracycline detection in water samples                                                                            | 2019 | Oxytetracycline | Pharmaceutical compounds | Electrochemical | 1.15 mg/L | Medium    | Wastewater  | Spiked | Individual                            | 8 | Tested after 30 days    | Could be reused at 5 times | [72] |
| Construction of Ce-MOF@COF hybrid nanostructure: Label-free aptasensor for the ultrasensitive detection of oxytetracycline residues in aqueous solution environments | 2019 | Oxytetracycline | Pharmaceutical compounds | Electrochemical | 17.4 pg/L | Ultrahigh | River water | Spiked | Individual and mixed with interferers | 5 | Stability after 15 days | NR                         | [73] |

Table S2. SELEX variants and purposes employing different technologies.

| Technique                                  | Purpose                                                      | Technology                                                                                                                                                                                | Result                                                                              | Limitation      | Reference |
|--------------------------------------------|--------------------------------------------------------------|-------------------------------------------------------------------------------------------------------------------------------------------------------------------------------------------|-------------------------------------------------------------------------------------|-----------------|-----------|
| Negative SELEX                             | Avoid false negatives                                        | Incubate the library with purification support agarose for better separation of bound and unbound sequences                                                                               | A 10-fold increase in aptamer affinity                                              | NR <sup>1</sup> | [74]      |
| Counter SELEX                              | Avoid false negatives                                        | It relies on the same technology of negative-SELEX and additionally uses structurally similar targets to incubate with aptamers to effectively discriminate non-specific oligonucleotides | Obtaining more specific aptamers                                                    | NR <sup>1</sup> | [75]      |
| Capillary Electrophoresis SELEX (CE-SELEX) | Separates target delimited sequences from unlinked sequences | Difference in electrophoretic mobility                                                                                                                                                    | Allows selection of aptamer candidates with high affinity, while reducing selection | NR <sup>1</sup> | [76,77]   |

|                                                      |                                                                                                                   |                                                                                                                                                                                                                                     |                                                                                                                                                                                                         |                                                                                                                    |         |
|------------------------------------------------------|-------------------------------------------------------------------------------------------------------------------|-------------------------------------------------------------------------------------------------------------------------------------------------------------------------------------------------------------------------------------|---------------------------------------------------------------------------------------------------------------------------------------------------------------------------------------------------------|--------------------------------------------------------------------------------------------------------------------|---------|
| rounds to 1-4 out of nearly 20 in conventional SELEX |                                                                                                                   |                                                                                                                                                                                                                                     |                                                                                                                                                                                                         |                                                                                                                    |         |
| Non-SELEX                                            | Select aptamers without amplification                                                                             | Non-Equilibrium Capillary Electrophoresis of Equilibrium Mixtures (NECEEM), which cleaves the oligonucleotide-target complex from the free oligonucleotides                                                                         | Shortens sorting time to one hour as opposed to several weeks or months required for a conventional SELEX                                                                                               | The volume of the library injected into the capillary limits the number of sequences (~10 <sup>12</sup> sequences) | [78]    |
| Micro Free Flow Electrophoresis (μFFE)               | Overcoming the limited size of the library used in non-SELEX                                                      | Use of highly specialized equipment for electrophoresis                                                                                                                                                                             | Library can reach up to ~10 <sup>14</sup> , a 300x improvement in library size over CE-SELEX                                                                                                            | Need to manufacture special μFFE equipment                                                                         | [79]    |
| Microfluidic SELEX (M-SELEX)                         | Develop a simple apparatus that is relatively inexpensive to assemble and perform automatic selection of aptamers | Combine the traditional SELEX with a microfluidic system. The prototype contains reagent-loaded microlines, a pressurized reagent reservoir manifold, a PCR thermal cycler, and actuatable valves for sample selection and routing. | NR <sup>1</sup>                                                                                                                                                                                         | It could generate aggregates, thus causing low aptamer purity and recovery                                         | [80,81] |
| Cell SELEX                                           | Create aptamers capable of binding to proteins at the endogenous level or under cellular conditions               | Use the entire living cell as the target                                                                                                                                                                                            | Direct use for diagnostic and therapeutic applications                                                                                                                                                  | Degradation of aptamers by in vivo conditions                                                                      | [82]    |
| In vivo SELEX                                        | Generate tissue-penetrating aptamers directly on models                                                           | Inject a set of aptamers into the target tissue or animal and subsequently extract the aptamers, amplify them, and reinject them into another animal or target tissue                                                               | Generate aptamers using live animal models as targets or selection conditions                                                                                                                           | Degradation of aptamers by in vivo conditions                                                                      | [83]    |
| High-Throughput Sequencing SELEX                     | Generate a method for the individual identification of the sequences and selection of the best aptamers           | Sequence the library in all rounds of selection. Therefore, the enriched sequences are visible at an earlier round                                                                                                                  | It enables global analysis of large sequence data sets and facilitates comprehensive characterization of aptamers, binding affinity and/or specificity, structure prediction, abundance quantification, | A high cost of operation                                                                                           | [84]    |

|               |                                                                      |                                                                        | and aptamer-target interactions                                                                                                                                        |                                                                        |      |
|---------------|----------------------------------------------------------------------|------------------------------------------------------------------------|------------------------------------------------------------------------------------------------------------------------------------------------------------------------|------------------------------------------------------------------------|------|
| FluMag-SELEX  | Improve the quantification of aptamers as well as their purification | Fluorescent labeling of DNA with magnetic separation technology        | Manual processing of multiple targets without the need for expensive robotics, and a selection procedure that is universal and adaptable to different types of targets | Inefficient for small molecules                                        | [85] |
| Capture-SELEX | Generation of aptamers for small molecules                           | Immobilization of a biotinylated hybridized library on a solid support | Generate aptamers against small molecule contaminants                                                                                                                  | A false positive can occur in the Capture-SELEX immobilization process | [86] |

<sup>1</sup> Not reported.

## References

- Deiminiat, B.; Rounaghi, G.H. Fabrication of a Novel Photoelectrochemical Aptasensor Using Gold Nanoparticle-Sensitized TiO<sub>2</sub> Film for Quantitative Determination of Diazinon in Solutions. *Electrocatalysis* **2023**, *14*, 484–498, doi:10.1007/s12678-023-00813-2.
- Fan, P.; Qian, X.; Li, Q.; Jiang, P.; Wu, Q.; Huang, G.; Zhang, Z.; Li, L. A Novel Label-Free Dual-Mode Aptasensor Based on the Mutual Regulation of Silver Nanoclusters and MoSe<sub>2</sub> Nanosheets for Reliable Detection of Ampicillin. *Anal Chim Acta* **2023**, *1251*, 340997, doi:https://doi.org/10.1016/j.aca.2023.340997.
- Gaviria-Arroyave, M.I.; Arango, J.P.; Barrientos Urdinola, K.; Cano, J.B.; Peñuela Mesa, G.A. Fluorescent Nanostructured Carbon Dot-Aptasensor for Chlorpyrifos Detection: Elucidating the Interaction Mechanism for an Environmentally Hazardous Pollutant. *Anal Chim Acta* **2023**, *1278*, 341711, doi:https://doi.org/10.1016/j.aca.2023.341711.
- Irfan, M.; Murtaza, G.; Fu, S.; Chen, A.; Qu, F.; Su, X. Molecular Simulation-Guided Aptasensor Design of Robust and Sensitive Lateral Flow Strip for Cadmium Ion Detection. *Analyst* **2023**, *148*, 1961–1969, doi:10.1039/D3AN00202K.
- Kushwah, M.; Yadav, R.; Berlina, A.N.; Gaur, K.; Gaur, M.S. Development of an Ultrasensitive RGO/AuNPs/SsDNA-Based Electrochemical Aptasensor for Detection of Pb<sup>2+</sup>. *Journal of Solid State Electrochemistry* **2023**, *27*, 559–574, doi:10.1007/s10008-022-05344-2.
- Macagno, J.; Gerlero, G.S.; Satuf, M.L.; Berli, C.L.A. Field-Deployable Aptasensor with Automated Analysis of Stain Patterns for the Detection of Chlorpyrifos in Water. *Talanta* **2023**, *252*, 123782, doi:https://doi.org/10.1016/j.talanta.2022.123782.
- Mou, Y.; Zhang, Y.; Lin, X.; Chen, M.; Xia, Y.; Zhu, S.; Wei, C.; Luo, X. Construction of a Novel Fluorescent DNA Aptasensor for the Fast-Response and Sensitive Detection of Copper Ions in Industrial Sewage. *Analytical Methods* **2023**, *15*, 3466–3475, doi:10.1039/D3AY00699A.

8. Muhammad, I.; Murtaza, G.; Zhao, Y.; Rizvi, A.S.; Fu, S.; Su, X.; Qu, F. Exploration of the Interaction of Cadmium and Aptamer by Molecular Simulation and Development of Sensitive Capillary Zone Electrophoresis-Based Aptasensor. *J Chem Inf Model* **2023**, *63*, 2783–2793, doi:10.1021/acs.jcim.3c00162.
9. Qi, Z.; Yan, P.; Qian, J.; Zhu, L.; Li, H.; Xu, L. A Photoelectrochemical Aptasensor Based on CoN/g-C<sub>3</sub>N<sub>4</sub> Donor-Acceptor Configuration for Sensitive Detection of Atrazine. *Sens Actuators B Chem* **2023**, *387*, 133792, doi:https://doi.org/10.1016/j.snb.2023.133792.
10. Su, C.; Dong, C.; Jiang, D.; Shan, X.; Chen, Z. Construction of Electrochemiluminescence Aptasensor for Acetamiprid Detection Using Flower-Liked SnO<sub>2</sub> Nanocrystals Encapsulated Ag<sub>3</sub>PO<sub>4</sub> Composite as Luminophore. *Microchemical Journal* **2023**, *187*, 108374, doi:https://doi.org/10.1016/j.microc.2022.108374.
11. Suo, Z.; Liang, R.; Liu, R.; Wei, M.; He, B.; Jiang, L.; Sun, X.; Jin, H. A Convenient Paper-Based Fluorescent Aptasensor for High-Throughput Detection of Pb<sup>2+</sup> in Multiple Real Samples (Water-Soil-Food). *Anal Chim Acta* **2023**, *1239*, 340714, doi:https://doi.org/10.1016/j.aca.2022.340714.
12. Wang, H.; Chen, Z.; Zhu, C.; Du, H.; Mao, J.; Qin, H.; She, Y.; Yan, M. An Interference-Free SERS-Based Aptasensor for Chlorpyrifos Detection. *Anal Chim Acta* **2023**, *1268*, 341398, doi:https://doi.org/10.1016/j.aca.2023.341398.
13. Wang, Y.; Li, Y.; Liu, C.; Dong, N.; Liu, D.; You, T. Laser Induced Graphene Electrochemical Aptasensor Based on Tetrahedral DNA for Ultrasensitive On-Site Detection of Microcystin-LR. *Biosens Bioelectron* **2023**, *239*, 115610, doi:https://doi.org/10.1016/j.bios.2023.115610.
14. Wei, J.; Ding, J.; Hu, Q.; Tian, X.; Bai, M.; Qian, J.; Wang, K. Internal Reference Self-Powered Aptasensor for on-Site Detection of MC-RR Used Sunlight as Light Source and CoMoS<sub>4</sub> Hollow Nanospheres as Photocathode. *Anal Chim Acta* **2023**, *1262*, 341239, doi:https://doi.org/10.1016/j.aca.2023.341239.
15. Wei, T.; Zhang, Y.; Wang, H.; Li, H.; Fang, T.; Wang, Z.; Dai, Z. Self-Assembled Electroactive MOF–Magnetic Dispersible Aptasensor Enables Ultrasensitive Microcystin-LR Detection in Eutrophic Water. *Chemical Engineering Journal* **2023**, *466*, 142809, doi:https://doi.org/10.1016/j.cej.2023.142809.
16. Yu, H.; Wang, C.; Xiong, X.; Dai, B.; Wang, Y.; Feng, Z.; Luo, H.; Zhu, J.; Shen, G.; Deng, Y.; et al. Development of Fe-N-C Single-Atom Nanozymes Assisted Aptasensor for the Detection of Acetamiprid in Water Samples. *Microchemical Journal* **2023**, *193*, 109174, doi:https://doi.org/10.1016/j.microc.2023.109174.
17. Yuan, M.; Yang, Y.; Chau, N.T.Q.; Zhang, Q.; Wu, X.; Chen, J.; Wu, Z.; Zhong, H.; Li, Y.; Xu, F. A Novel Fluorescent Aptasensor for Arsenic(III) Detection Based on a Triple-Helix Molecular Switch. *Molecules* **2023**, *28*, 2341, doi:10.3390/molecules28052341.
18. Zhang, Y.; Zhu, Y.; Zeng, T.; Qiao, L.; Zhang, M.; Song, K.; Yin, N.; Tao, Y.; Zhao, Y.; Zhang, C.; et al. Self-Powered Photoelectrochemical Aptasensor Based on Hollow Tubular g-C<sub>3</sub>N<sub>4</sub>/Bi/BiVO<sub>4</sub> for Tobramycin Detection. *Anal Chim Acta* **2023**, *1250*, 340951, doi:https://doi.org/10.1016/j.aca.2023.340951.
19. Zhang, Z.; Ding, X.; Lu, G.; Du, B.; Liu, M. A Highly Sensitive and Selective Photoelectrochemical Aptasensor for Atrazine Based on Au NPs/3DOM TiO<sub>2</sub> Photonic Crystal Electrode. *J Hazard Mater* **2023**, *451*, 131132, doi:https://doi.org/10.1016/j.jhazmat.2023.131132.
20. Zhang, Z.; Karimi-Maleh, H. In Situ Synthesis of Label-Free Electrochemical Aptasensor-Based Sandwich-like AuNPs/PPy/Ti<sub>3</sub>C<sub>2</sub>Tx for Ultrasensitive Detection of Lead Ions as Hazardous Pollutants in Environmental Fluids. *Chemosphere* **2023**, *324*, 138302, doi:https://doi.org/10.1016/j.chemosphere.2023.138302.
21. Zhang, Z.; Karimi-Maleh, H. Label-Free Electrochemical Aptasensor Based on Gold Nanoparticles/Titanium Carbide MXene for Lead Detection with Its Reduction Peak as Index Signal. *Adv Compos Hybrid Mater* **2023**, *6*, 68, doi:10.1007/s42114-023-00652-1.

22. Zhu, Y.; Li, X.; Wu, M.; Shi, M.; Tian, Q.; Fu, L.; Tsai, H.-S.; Xie, W.-F.; Lai, G.; Wang, G.; et al. A Novel Electrochemical Aptasensor Based on Eco-Friendly Synthesized Titanium Dioxide Nanosheets and Polyethyleneimine Grafted Reduced Graphene Oxide for Ultrasensitive and Selective Detection of Ciprofloxacin. *Anal Chim Acta* **2023**, *1275*, 341607, doi:https://doi.org/10.1016/j.aca.2023.341607.
23. Li, L.; Chen, B.; Liu, X.; Jiang, P.; Luo, L.; Li, X.; You, T. 'On-off-on' Electrochemiluminescent Aptasensor for Hg<sup>2+</sup> Based on Dual Signal Amplification Enabled by a Self-Enhanced Luminophore and Resonance Energy Transfer. *Journal of Electroanalytical Chemistry* **2022**, *907*, 116063, doi:https://doi.org/10.1016/j.jelechem.2022.116063.
24. Chen, Y.; Xu, L.; Yang, M.; Jia, Y.; Yan, Y.; Qian, J.; Chen, F.; Li, H. Design of 2D/2D CoAl LDH/g-C<sub>3</sub>N<sub>4</sub> Heterojunction-Driven Signal Amplification: Fabrication and Assay for Photoelectrochemical Aptasensor of Ofloxacin. *Sens Actuators B Chem* **2022**, *353*, 131187, doi:https://doi.org/10.1016/j.snb.2021.131187.
25. Liu, T.; Lin, B.; Yuan, X.; Chu, Z.; Jin, W. In Situ Fabrication of Urchin-like Cu@carbon Nanoneedles Based Aptasensor for Ultrasensitive Recognition of Trace Mercury Ion. *Biosens Bioelectron* **2022**, *206*, 114147, doi:https://doi.org/10.1016/j.bios.2022.114147.
26. Sun, Z.; Zhao, L.; Li, C.; Jiang, Y.; Wang, F. Direct Z-Scheme In<sub>2</sub>S<sub>3</sub>/Bi<sub>2</sub>S<sub>3</sub> Heterojunction-Based Photoelectrochemical Aptasensor for Detecting Oxytetracycline in Water. *J Environ Chem Eng* **2022**, *10*, 107404, doi:https://doi.org/10.1016/j.jece.2022.107404.
27. Wei, Q.; Zhang, P.; Pu, H.; Sun, D.-W. A Fluorescence Aptasensor Based on Carbon Quantum Dots and Magnetic Fe<sub>3</sub>O<sub>4</sub> Nanoparticles for Highly Sensitive Detection of 17 $\beta$ -Estradiol. *Food Chem* **2022**, *373*, 131591, doi:https://doi.org/10.1016/j.foodchem.2021.131591.
28. Xu, C.; Lin, M.; Song, C.; Chen, D.; Bian, C. A Gold Nanoparticle-Based Visual Aptasensor for Rapid Detection of Acetamiprid Residues in Agricultural Products Using a Smartphone. *RSC Adv* **2022**, *12*, 5540–5545, doi:10.1039/D2RA00348A.
29. Yang, L.; Ye, X.; Li, X.; Huang, Z.; Chen, F.; Yang, W.; Wang, Z. Colorimetric Aptasensor for Sensitive Detection of Quinclorac Based on Exonuclease III-Assisted Cyclic Release of Phosphorodiamidate Morpholino Oligomer Mimic Enzyme Strategy. *Anal Chim Acta* **2022**, *1207*, 339815, doi:https://doi.org/10.1016/j.aca.2022.339815.
30. Chen, Y.; Xu, L.; Dong, J.; Yan, P.; Chen, F.; Qian, J.; Li, H. An Enhanced Photoelectrochemical Ofloxacin Aptasensor Using NiFe Layered Double Hydroxide/Graphitic Carbon Nitride Heterojunction. *Electrochim Acta* **2021**, *368*, 137595, doi:https://doi.org/10.1016/j.electacta.2020.137595.
31. Chen, Y.; Yan, P.; Lu, G.; Chen, J.; Chen, F.; Xu, L. A Highly Selective Photoelectrochemical Chloramphenicol Aptasensor Based on AgBr/BiOBr Heterojunction. *Inorg Chem Commun* **2021**, *123*, 108333, doi:https://doi.org/10.1016/j.inoche.2020.108333.
32. Chen, Y.; Wang, Z.; Liu, S.; Zhao, G. A Highly Sensitive and Group-Targeting Aptasensor for Total Phthalate Determination in the Environment. *J Hazard Mater* **2021**, *412*, 125174, doi:https://doi.org/10.1016/j.jhazmat.2021.125174.
33. Chen, Y.; Zhu, Q.; Zhou, X.; Wang, R.; Yang, Z. Reusable, Facile, and Rapid Aptasensor Capable of Online Determination of Trace Mercury. *Environ Int* **2021**, *146*, 106181, doi:https://doi.org/10.1016/j.envint.2020.106181.

34. Fan, L.; Liang, G.; Yan, W.; Guo, Y.; Bi, Y.; Dong, C. A Highly Sensitive Photoelectrochemical Aptasensor Based on BiVO<sub>4</sub> Nanoparticles-TiO<sub>2</sub> Nanotubes for Detection of PCB72. *Talanta* **2021**, *233*, 122551, doi:<https://doi.org/10.1016/j.talanta.2021.122551>.
35. Fan, L.; Zhang, C.; Liang, G.; Yan, W.; Guo, Y.; Bi, Y.; Dong, C. Highly Sensitive Photoelectrochemical Aptasensor Based on MoS<sub>2</sub> Quantum Dots/TiO<sub>2</sub> Nanotubes for Detection of Atrazine. *Sens Actuators B Chem* **2021**, *334*, 129652, doi:<https://doi.org/10.1016/j.snb.2021.129652>.
36. Ding, J.; Zhang, D.; Liu, Y.; Zhan, X.; Lu, Y.; Zhou, P.; Zhang, D. An Electrochemical Aptasensor for Pb<sup>2+</sup> Detection Based on Metal–Organic-Framework-Derived Hybrid Carbon. *Biosensors (Basel)* **2020**, *11*, 1, doi:10.3390/bios11010001.
37. Hamami, M.; Bouaziz, M.; Raouafi, N.; Bendounan, A.; Korri-Youssoufi, H. MoS<sub>2</sub>/PPy Nanocomposite as a Transducer for Electrochemical Aptasensor of Ampicillin in River Water. *Biosensors (Basel)* **2021**, *11*, 311, doi:10.3390/bios11090311.
38. Li, L.; Chen, B.; Luo, L.; Liu, X.; Bi, X.; You, T. Sensitive and Selective Detection of Hg<sup>2+</sup> in Tap and Canal Water via Self-Enhanced ECL Aptasensor Based on NH<sub>2</sub>-Ru@SiO<sub>2</sub>-NGQDs. *Talanta* **2021**, *222*, 121579, doi:<https://doi.org/10.1016/j.talanta.2020.121579>.
39. Rabai, S.; Benounis, M.; Catanante, G.; Baraket, A.; Errachid, A.; Jaffrezic Renault, N.; Marty, J.-L.; Rhouati, A. Development of a Label-Free Electrochemical Aptasensor Based on Diazonium Electrodeposition: Application to Cadmium Detection in Water. *Anal Biochem* **2021**, *612*, 113956, doi:<https://doi.org/10.1016/j.ab.2020.113956>.
40. Salandari-Jolge, N.; Ensafi, A.A.; Rezaei, B. Ultra-Sensitive Electrochemical Aptasensor Based on Zeolitic Imidazolate Framework-8 Derived Ag/Au Core-Shell Nanoparticles for Mercury Detection in Water Samples. *Sens Actuators B Chem* **2021**, *331*, 129426, doi:<https://doi.org/10.1016/j.snb.2020.129426>.
41. Tian, C.; Zhao, L.; Zhu, J.; Zhang, S. Ultrasensitive Detection of Trace Hg<sup>2+</sup> by SERS Aptasensor Based on Dual Recycling Amplification in Water Environment. *J Hazard Mater* **2021**, *416*, 126251, doi:<https://doi.org/10.1016/j.jhazmat.2021.126251>.
42. Lin, J.; Shi, A.; Zheng, Z.; Huang, L.; Wang, Y.; Lin, H.; Lin, X. Simultaneous Quantification of Ampicillin and Kanamycin in Water Samples Based on Lateral Flow Aptasensor Strip with an Internal Line. *Molecules* **2021**, *26*, 3806, doi:10.3390/molecules26133806.
43. Nguyen, D.K.; Jang, C.-H. A Cationic Surfactant-Decorated Liquid Crystal-Based Aptasensor for Label-Free Detection of Malathion Pesticides in Environmental Samples. *Biosensors (Basel)* **2021**, *11*, 92, doi:10.3390/bios11030092.
44. Qi, H.; Huang, X.; Wu, J.; Zhang, J.; Wang, F.; Qu, H.; Zheng, L. A Disposable Aptasensor Based on a Gold-Plated Coplanar Electrode Array for on-Site and Real-Time Determination of Cu<sup>2+</sup>. *Anal Chim Acta* **2021**, *1183*, 338991, doi:<https://doi.org/10.1016/j.aca.2021.338991>.
45. Song, Y.; Xu, M.; Liu, X.; Li, Z.; Wang, C.; Jia, Q.; Zhang, Z.; Du, M. A Label-Free Enrofloxacin Electrochemical Aptasensor Constructed by a Semiconducting CoNi-Based Metal–Organic Framework (MOF). *Electrochim Acta* **2021**, *368*, 137609, doi:<https://doi.org/10.1016/j.electacta.2020.137609>.
46. Su, C.; Song, Q.; Jiang, D.; Dong, C.; Shan, X.; Chen, Z. An Electrochemiluminescence Aptasensor for Diethylstilbestrol Assay Based on Resonance Energy Transfer between Ag<sub>3</sub>PO<sub>4</sub>-Cu-MOF(Ii) and Silver Nanoparticles. *Analyst* **2021**, *146*, 4254–4260, doi:10.1039/D1AN00599E.

47. Wang, Y.; Yan, X.; Kou, Q.; Sun, Q.; Wang, Y.; Wu, P.; Yang, L.; Tang, J.; Le, T. An Ultrasensitive Label-Free Fluorescent Aptasensor Platform for Detection of Sulfamethazine. *Int J Nanomedicine* **2021**, Volume 16, 2751–2759, doi:10.2147/IJN.S307080.
48. Xu, J.; Qing, T.; Jiang, Z.; Zhang, P.; Feng, B. Graphene Oxide-Regulated Low-Background Aptasensor for the “Turn on” Detection of Tetracycline. *Spectrochim Acta A Mol Biomol Spectrosc* **2021**, 260, 119898, doi:https://doi.org/10.1016/j.saa.2021.119898.
49. Yuan, R.; Ding, L.; You, F.; Wen, Z.; Liu, Q.; Wang, K. B, N Co-Doped Graphene Synergistic Catalyzed ZnO Quantum Dots with Amplified Cathodic Electrochemiluminescence for Fabricating Microcystin-LR Aptasensor. *Sens Actuators B Chem* **2021**, 349, 130795, doi:https://doi.org/10.1016/j.snb.2021.130795.
50. Yuan, R.; Wen, Z.; You, F.; Jiang, D.; Wang, K. Catalysis-Induced Performance Enhancement of an Electrochemical Microcystin-LR Aptasensor Based on Cobalt-Based Oxide on a B, N Co-Doped Graphene Hydrogel. *Analyst* **2021**, 146, 2574–2580, doi:10.1039/D1AN00236H.
51. Zou, L.; Li, X.; Lai, Y. Colorimetric Aptasensor for Sensitive Detection of Kanamycin Based on Target-Triggered Catalytic Hairpin Assembly Amplification and DNA-Gold Nanoparticle Probes. *Microchemical Journal* **2021**, 162, 105858, doi:https://doi.org/10.1016/j.microc.2020.105858.
52. Chen, X.-X.; Lin, Z.-Z.; Hong, C.-Y.; Yao, Q.-H.; Huang, Z.-Y. A Dichromatic Label-Free Aptasensor for Sulfadimethoxine Detection in Fish and Water Based on AuNPs Color and Fluorescent Dyeing of Double-Stranded DNA with SYBR Green I. *Food Chem* **2020**, 309, 125712, doi:https://doi.org/10.1016/j.foodchem.2019.125712.
53. Chen, Y.; Wang, Y.; Yan, P.; Ouyang, Q.; Dong, J.; Qian, J.; Chen, J.; Xu, L.; Li, H. Co3O4 Nanoparticles/Graphitic Carbon Nitride Heterojunction for Photo-electrochemical Aptasensor of Oxytetracycline. *Anal Chim Acta* **2020**, 1125, 299–307, doi:https://doi.org/10.1016/j.aca.2020.05.038.
54. Li, J.; Shan, X.; Jiang, D.; Chen, Z. An Ultrasensitive Electrochemiluminescence Aptasensor for the Detection of Diethylstilbestrol Based on the Enhancing Mechanism of the Metal–Organic Framework NH<sub>2</sub>-MIL-125(Ti) in a 3,4,9,10-Perylenetetracarboxylic Acid/K<sub>2</sub>S<sub>2</sub>O<sub>8</sub> System. *Analyst* **2020**, 145, 3306–3312, doi:10.1039/D0AN00212G.
55. Khoshbin, Z.; Housaindokht, M.R.; Verdian, A. A Low-Cost Paper-Based Aptasensor for Simultaneous Trace-Level Monitoring of Mercury (II) and Silver (I) Ions. *Anal Biochem* **2020**, 597, 113689, doi:https://doi.org/10.1016/j.ab.2020.113689.
56. Memon, A.G.; Xing, Y.; Zhou, X.; Wang, R.; Liu, L.; Zeng, S.; He, M.; Ma, M. Ultrasensitive Colorimetric Aptasensor for Hg<sup>2+</sup> Detection Using Exo-III Assisted Target Recycling Amplification and Unmodified AuNPs as Indicators. *J Hazard Mater* **2020**, 384, 120948, doi:https://doi.org/10.1016/j.jhazmat.2019.120948.
57. Mohammadi, A.; Heydari-Bafrooei, E.; Foroughi, M.M.; Mohammadi, M. Electrochemical Aptasensor for Ultrasensitive Detection of PCB77 Using Thionine-Functionalized MoS<sub>2</sub>-RGO Nanohybrid. *Microchemical Journal* **2020**, 155, 104747, doi:https://doi.org/10.1016/j.microc.2020.104747.
58. Song, J.; Huang, M.; Jiang, N.; Zheng, S.; Mu, T.; Meng, L.; Liu, Y.; Liu, J.; Chen, G. Ultrasensitive Detection of Amoxicillin by TiO<sub>2</sub>-g-C<sub>3</sub>N<sub>4</sub>@AuNPs Impedimetric Aptasensor: Fabrication, Optimization, and Mechanism. *J Hazard Mater* **2020**, 391, 122024, doi:https://doi.org/10.1016/j.jhazmat.2020.122024.
59. Song, Y.; Xu, M.; Li, Z.; He, L.; Hu, M.; He, L.; Zhang, Z.; Du, M. Ultrasensitive Detection of Bisphenol A under Diverse Environments with an Electrochemical Aptasensor Based on Multicomponent AgMo Heteronanostructure. *Sens Actuators B Chem* **2020**, 321, 128527, doi:https://doi.org/10.1016/j.snb.2020.128527.



- 
60. Xu, L.; Duan, W.; Chen, F.; Zhang, J.; Li, H. A Photoelectrochemical Aptasensor for the Determination of Bisphenol A Based on the Cu (I) Modified Graphitic Carbon Nitride. *J Hazard Mater* **2020**, *400*, 123162, doi:<https://doi.org/10.1016/j.jhazmat.2020.123162>.
61. Mat Zaid, M.H.; Abdullah, J.; Rozi, N.; Mohamad Rozlan, A.A.; Abu Hanifah, S. A Sensitive Impedimetric Aptasensor Based on Carbon Nanodots Modified Electrode for Detection of 17 $\beta$ -Estradiol. *Nanomaterials* **2020**, *10*, 1346, doi:[10.3390/nano10071346](https://doi.org/10.3390/nano10071346).
62. Zhao, Z.; Zheng, J.; Nguyen, E.P.; Tao, D.; Cheng, J.; Pan, H.; Zhang, L.; Jaffrezic-Renault, N.; Guo, Z. A Novel SWCNT-Amplified “Signal-on” Electrochemical Aptasensor for the Determination of Trace Level of Bisphenol A in Human Serum and Lake Water. *Microchimica Acta* **2020**, *187*, 500, doi:[10.1007/s00604-020-04475-5](https://doi.org/10.1007/s00604-020-04475-5).
63. Blidar, A.; Feier, B.; Tertis, M.; Galatus, R.; Cristea, C. Electrochemical Surface Plasmon Resonance (EC-SPR) Aptasensor for Ampicillin Detection. *Anal Bioanal Chem* **2019**, *411*, 1053–1065, doi:[10.1007/s00216-018-1533-5](https://doi.org/10.1007/s00216-018-1533-5).
64. Chen, X.-X.; Lin, Z.-Z.; Hong, C.-Y.; Zhong, H.-P.; Yao, Q.-H.; Huang, Z.-Y. Label-Free Fluorescence-Based Aptasensor for the Detection of Sulfadimethoxine in Water and Fish. *Appl Spectrosc* **2019**, *73*, 294–303, doi:[10.1177/0003702818799100](https://doi.org/10.1177/0003702818799100).
65. Fan, L.; Wang, G.; Liang, W.; Yan, W.; Guo, Y.; Shuang, S.; Dong, C.; Bi, Y. Label-Free and Highly Selective Electrochemical Aptasensor for Detection of PCBs Based on Nickel Hexacyanoferrate Nanoparticles/Reduced Graphene Oxides Hybrids. *Biosens Bioelectron* **2019**, *145*, 111728, doi:<https://doi.org/10.1016/j.bios.2019.111728>.
66. Fan, L.; Zhang, C.; Shi, H.; Zhao, G. Design of a Simple and Novel Photoelectrochemical Aptasensor for Detection of 3,3',4,4'-Tetrachlorobiphenyl. *Biosens Bioelectron* **2019**, *124–125*, 8–14, doi:<https://doi.org/10.1016/j.bios.2018.09.054>.
67. Liu, X.; Hu, M.; Wang, M.; Song, Y.; Zhou, N.; He, L.; Zhang, Z. Novel Nanoarchitecture of Co-MOF-on-TPN-COF Hybrid: Ultralowly Sensitive Bioplatfrom of Electrochemical Aptasensor toward Ampicillin. *Biosens Bioelectron* **2019**, *123*, 59–68, doi:<https://doi.org/10.1016/j.bios.2018.09.089>.
68. Chen, Z.; Li, P.; Cheng, X.; Yang, W.; Wu, Y.; Chen, Q.; Fu, F. Multicolor Aptasensor Based on DNA-Induced Au–Ag Nanorods for Simultaneous and Visual Detection of Inorganic and Organic Mercury. *ACS Omega* **2019**, *4*, 15112–15119, doi:[10.1021/acsomega.9b01994](https://doi.org/10.1021/acsomega.9b01994).
69. Li, S.; Ma, X.; Pang, C.; Tian, H.; Xu, Z.; Yang, Y.; Lv, D.; Ge, H. Fluorometric Aptasensor for Cadmium(II) by Using an Aptamer-Imprinted Polymer as the Recognition Element. *Microchimica Acta* **2019**, *186*, 823, doi:[10.1007/s00604-019-3886-7](https://doi.org/10.1007/s00604-019-3886-7).
70. Saberi, Z.; Rezaei, B.; Ensafi, A.A. Fluorometric Label-Free Aptasensor for Detection of the Pesticide Acetamiprid by Using Cationic Carbon Dots Prepared with Cetrimonium Bromide. *Microchimica Acta* **2019**, *186*, 273, doi:[10.1007/s00604-019-3378-9](https://doi.org/10.1007/s00604-019-3378-9).
71. Yang, R.; Liu, J.; Song, D.; Zhu, A.; Xu, W.; Wang, H.; Long, F. Reusable Chemiluminescent Fiber Optic Aptasensor for the Determination of 17 $\beta$ -Estradiol in Water Samples. *Microchimica Acta* **2019**, *186*, 726, doi:[10.1007/s00604-019-3813-y](https://doi.org/10.1007/s00604-019-3813-y).
72. Yildirim-Tirgil, N.; Lee, J.; Cho, H.; Lee, H.; Somu, S.; Busnaina, A.; Gu, A.Z. A SWCNT Based Aptasensor System for Antibiotic Oxytetracycline Detection in Water Samples. *Analytical Methods* **2019**, *11*, 2692–2699, doi:[10.1039/C9AY00455F](https://doi.org/10.1039/C9AY00455F).

- 
73. Zhou, N.; Ma, Y.; Hu, B.; He, L.; Wang, S.; Zhang, Z.; Lu, S. Construction of Ce-MOF@COF Hybrid Nanostructure: Label-Free Aptasensor for the Ultrasensitive Detection of Oxytetracycline Residues in Aqueous Solution Environments. *Biosens Bioelectron* **2019**, *127*, 92–100, doi:<https://doi.org/10.1016/j.bios.2018.12.024>.
  74. Ellington, A.D.; Szostak, J.W. Selection in Vitro of Single-Stranded DNA Molecules That Fold into Specific Ligand-Binding Structures. *Nature* **1992**, *355*, 850–852, doi:10.1038/355850a0.
  75. Jenison, R.D.; Gill, S.C.; Pardi, A.; Polisky, B. High-Resolution Molecular Discrimination by RNA. *Science (1979)* **1994**, *263*, 1425–1429, doi:10.1126/science.7510417.
  76. Mendonsa, S.D.; Bowser, M.T. In Vitro Evolution of Functional DNA Using Capillary Electrophoresis. *J Am Chem Soc* **2004**, *126*, 20–21, doi:10.1021/ja037832s.
  77. Mendonsa, S.D.; Bowser, M.T. In Vitro Selection of High-Affinity DNA Ligands for Human IgE Using Capillary Electrophoresis. *Anal Chem* **2004**, *76*, 5387–5392, doi:10.1021/ac049857v.
  78. Ashley, J.; Ji, K.; Li, S.F.Y. Selection of Bovine Catalase Aptamers Using Non-SELEX. *Electrophoresis* **2012**, *33*, 2783–2789, doi:<https://doi.org/10.1002/elps.201200032>.
  79. Jing, M.; Bowser, M.T. Isolation of DNA Aptamers Using Micro Free Flow Electrophoresis. *Lab Chip* **2011**, *11*, 3703–3709, doi:10.1039/C1LC20461K.
  80. Hybarger, G.; Bynum, J.; Williams, R.F.; Valdes, J.J.; Chambers, J.P. A Microfluidic SELEX Prototype. *Anal Bioanal Chem* **2006**, *384*, 191–198, doi:10.1007/s00216-005-0089-3.
  81. Park, S.; Ahn, J.-Y.; Jo, M.; Lee, D.; Lis, J.T.; Craighead, H.G.; Kim, S. Selection and Elution of Aptamers Using Nanoporous Sol-Gel Arrays with Integrated Microheaters. *Lab Chip* **2009**, *9*, 1206–1212, doi:10.1039/B814993C.
  82. Daniels, D.A.; Chen, H.; Hicke, B.J.; Swiderek, K.M.; Gold, L. A Tenascin-C Aptamer Identified by Tumor Cell SELEX: Systematic Evolution of Ligands by Exponential Enrichment. *Proceedings of the National Academy of Sciences* **2003**, *100*, 15416–15421, doi:10.1073/pnas.2136683100.
  83. Mi, J.; Liu, Y.; Rabbani, Z.N.; Yang, Z.; Urban, J.H.; Sullenger, B.A.; Clary, B.M. In Vivo Selection of Tumor-Targeting RNA Motifs. *Nat Chem Biol* **2010**, *6*, 22–24, doi:10.1038/nchembio.277.
  84. Nguyen Quang, N.; Perret, G.; Ducongé, F. Applications of High-Throughput Sequencing for In Vitro Selection and Characterization of Aptamers. *Pharmaceuticals* **2016**, *9*, 76, doi:10.3390/ph9040076.
  85. Stoltenburg, R.; Reinemann, C.; Strehlitz, B. FluMag-SELEX as an Advantageous Method for DNA Aptamer Selection. *Anal Bioanal Chem* **2005**, *383*, 83–91, doi:10.1007/s00216-005-3388-9.
  86. Lyu, C.; Khan, I.M.; Wang, Z. Capture-SELEX for Aptamer Selection: A Short Review. *Talanta* **2021**, *229*, 122274, doi:<https://doi.org/10.1016/j.talanta.2021.122274>.
